1  
2  
3  
4  
5  
6  
7  
8  
9  
10  
11  
12  
13  
14  
15  
16  
17  
18  
19

# Mecamylamine inhibits seizure-like activity in CA1-CA3 hippocampus through antagonism to nicotinic receptors

Olha Zapukhliak<sup>1</sup>, Olga Netsyk<sup>1</sup>, Artur Romanov<sup>1</sup>, Oleksandr Maximyuk<sup>1</sup>, Murat Oz<sup>2</sup>, Gregory L. Holmes<sup>3</sup>, Oleg Krishtal<sup>1</sup>, and Dmytro Isaev<sup>1\*</sup>

<sup>1</sup>Department of Cellular Membranology, Bogomoletz Institute of Physiology, Kiev, Ukraine.

<sup>2</sup>Department of Pharmacology and Therapeutics, Faculty of Pharmacy, Kuwait University, Safat, Kuwait.

<sup>3</sup>Neurology, Larner College of Medicine, University of Vermont, Burlington, Vermont, U.S.A.

\* Corresponding author

E-mail: [dmytro.isaev@gmail.com](mailto:dmytro.isaev@gmail.com) (DS)

## 20           **Abstract**

21           Cholinergic modulation of hippocampal network function is implicated in multiple  
22 behavioral and cognitive states. Activation of nicotinic and muscarinic acetylcholine  
23 receptors affects neuronal excitability, synaptic transmission and rhythmic oscillations in  
24 the hippocampus. In this work, we study the ability of the cholinergic system to sustain  
25 hippocampal epileptiform activity independently from glutamate and GABA  
26 transmission. Simultaneous CA3 and CA1 field potential recordings were obtained during  
27 the perfusion of hippocampal slices with the aCSF containing AMPA, NMDA and GABA  
28 receptor antagonists. Under these conditions, recurrent field discharges synchronous  
29 between CA3 and CA1 were recorded. Field discharges were blocked by addition of  
30 calcium-channel blocker Cd<sup>2+</sup> and disappeared in CA1 after a surgical cut between CA3  
31 and CA1. Cholinergic antagonist mecamylamine abolished CA3-CA1 synchronous field  
32 discharges, while antagonists of  $\alpha 7$  and  $\alpha 4\beta 2$  nAChRs – MLA and Dh $\beta$ E had no effect.  
33 Our results suggest that activation of nicotinic acetylcholine receptors is able to sustain  
34 CA3-CA1 synchronous epileptiform activity independently from AMPA NMDA and  
35 GABA transmission. In addition, mecamylamine but not  $\alpha 7$  and  $\alpha 4\beta 2$  nAChRs  
36 antagonists reduce bicuculline-induced seizure-like activity. The ability of mecamylamine  
37 to decrease hippocampal network synchronization might be associated with its therapeutic  
38 effects in a wide variety of CNS disorders including addiction, depression and anxiety.

39

## 40 Introduction

41 Acetylcholine (ACh) exerts a wide range of neuromodulatory effects in numerous  
42 physiological and pathological states [1]. The action of ACh is mediated by two types of  
43 receptors: muscarinic (mAChRs) and nicotinic (nAChRs), named after their respective  
44 agonists muscarine and nicotine. While the muscarinic type G-protein coupled receptors  
45 (GPCRs) mediate a slow metabolic response via second-messenger cascades, the nicotinic  
46 type are ligand-gated ion channels that mediate fast cholinergic synaptic transmission [2-  
47 3]. In hippocampus several subtypes of nicotinic ( $\alpha 7$ ,  $\alpha 4\beta 2$   $\alpha 3\beta 4$ ) and muscarinic (M1-  
48 M4) acetylcholine receptors are widely expressed in pyramidal cells and interneurons at  
49 pre- and postsynaptic sites [4-5]. Activation of AChRs has an important role in  
50 hippocampal hypersynchronization and pacing of neuronal activity [6-7]. Cholinergic  
51 agonist carbachol induces rhythmic oscillations that resemble patterns of epileptiform  
52 activity in vitro [8-10]. Cholinergic agonist pilocarpine induces status epilepticus in vivo  
53 and recently it was shown that administration of pilocarpine causes a 6-fold increase of  
54 hippocampal ACh release paralleling the development of tonic seizures [11-13]. High  
55 doses of nicotine also induce seizures in animals, and mutations in genes coding for  
56 nAChR subunit are associated with seizures in humans [14-16]. Despite these multiple  
57 links to epilepsy, the exact function of cholinergic receptors in patterning of hippocampal  
58 synchronization remains unclear.

59 Synchronization of hippocampal fields is primarily mediated by glutamatergic and  
60 GABAergic synaptic transmission. Because of that, the influence of endogenous ACh is

61 easily concealed during field potential recordings. The aim of this study was to investigate  
62 the ability of cholinergic neuromodulation to sustain hippocampal field synchronization  
63 in the absence of GABAergic and glutamatergic transmission. Field potential recordings  
64 were obtained in CA3 and CA1 during perfusion of hippocampal slices with aCSF  
65 containing AMPA, NMDA and GABA receptor antagonists. Cholinergic antagonists were  
66 added to the perfusion solution to study the effect of AChRs activation during  
67 hippocampal field synchronization. We also compared the effects of nicotinic antagonist  
68 mecamylamine (MEC) and selective  $\alpha 7$  and  $\alpha 4\beta 2$  nAChRs antagonists on induced  
69 hippocampal seizure-like activity.

70

## 71 **Materials and Methods**

### 72 **Animals**

73 All experimental procedures were performed on Wistar rats according to the  
74 guidelines provided by the National Institutes of Health for the humane treatment of  
75 animals and approved by the Animal Care Committee of Bogomoletz Institute of  
76 Physiology of National Academy of Science of Ukraine. Postnatal day 10-14 rats were  
77 deeply anesthetized using sevoflurane and decapitated. Transverse brain slices were  
78 prepared according to previously described techniques [17]. Briefly, brains were removed  
79 and placed in the ice-cold aCSF of the following composition (in mM): 126 NaCl, 3.5  
80 KCl, 2 CaCl<sub>2</sub>, 1.3 MgCl<sub>2</sub>, 1.25 NaH<sub>2</sub>PO<sub>4</sub>, 24 NaHCO<sub>3</sub>, 11 D-glucose). The 500 $\mu$ m thick

81 slices were cut using a Vibroslice NVSL (World Precision Instruments, Sarasota, FL).  
82 Slices equilibrated at room temperature and constantly oxygenated aCSF for at least two  
83 hours before the experiment.

## 84 **Induction of epileptiform activity**

85 Synchronous field discharges were induced by perfusion of hippocampal slices with  
86 the low-Mg<sup>2+</sup> aCSF containing AMPA, NMDA and GABA receptor antagonists, which  
87 we refer to as “synaptic blockers aCSF”. Synaptic blockers aCSF has the following  
88 composition (in mM): 100 NaCl, 5 KCl, 1 CaCl<sub>2</sub>, 1.25 NaH<sub>2</sub>PO<sub>4</sub>, 24 NaHCO<sub>3</sub>, 11 D-  
89 glucose; and 6,7-dinitroquinoxaline-2,3-dione (DNQX 10μM); S,10R-(+)-5-methyl-  
90 10,11-dihydro-5H-dibenzo[a,d]cyclohepten-5,10-imine maleate (MK-801 2 μM); [R-  
91 (R\*,S\*)]-6-(5,6,7,8-tetrahydro-6-methyl-1,3-dioxolo[4,5-g]isoquinolin-5-yl)furo[3,4-e]-  
92 1,3-benzodioxol-8(6H)one (bicuculline 10μM).

93 Nonsynaptic seizure-like activity (SLA) was induced by perfusion of the  
94 hippocampal slices with low-Ca<sup>2+</sup> aCSF of the following composition (in mM): 115 NaCl,  
95 5 KCl, 1 MgCl<sub>2</sub>, 1.25 NaH<sub>2</sub>PO<sub>4</sub>, 24 NaHCO<sub>3</sub>, 11 D-glucose.

96 Bicuculline (10 μM) and 4-aminopyridine (4-AP, 100μM) were used to induce SLA  
97 in the following aCSF (in mM): 125 NaCl, 5 KCl, 1 CaCl<sub>2</sub>, 1.3 MgCl<sub>2</sub>, 1.25 NaH<sub>2</sub>PO<sub>4</sub>, 11  
98 D-glucose, 24 NaHCO<sub>3</sub>. Chemicals were purchased from Sigma (St. Louis, MO), DNQX,  
99 DhβE, d-tubocurarine were obtained from Tocris (Ellisville, MO).

## 100 **Extracellular and patch clamp recordings**

101 For extracellular recordings slices were transferred to a submerged recording  
102 chamber and perfused with oxygenated aCSF (22-25°C) at a rate of 2-3 ml\*min<sup>-1</sup>.  
103 Temperature control was performed with the Dual Temperature Controller (TC-144,  
104 Warner Instruments). Simultaneous recordings of field potentials were obtained from the  
105 CA3 and CA1 pyramidal cell layer with extracellular glass microelectrodes (2–3 MΩ)  
106 filled with aCSF. Signals were low-pass filtered (0.5 kHz), amplified using a 2-channel  
107 differential amplifier M1800 (A-M Systems, Carlsborg, WA), digitized at 10 kHz using  
108 an analog-to-digital converter (NI PCI-6221; National Instruments, Austin, TX).

109 Patch clamp recordings were performed simultaneously with extracellular  
110 recording to investigate the coincidence of postsynaptic currents and field discharges.  
111 CA1 pyramidal cells were visually identified with an infrared-differential interference  
112 contrast (IR-DIC) microscope (Olympus BX50WI) and captured with a CoolSNAP ES2  
113 (CCD ICX285) video camera. Spontaneous postsynaptic currents were recorded from  
114 CA1 pyramidal cells using a patch clamp technique in a whole-cell configuration. Patch  
115 electrodes were fabricated from borosilicate glass capillaries of 1.5 mm outer diameter  
116 (Sutter Instruments, USA) using a programmable puller (P-97; Sutter Instruments, USA).  
117 The recording pipettes were filled with (in mM): 100 Cs-gluconate, 17.5 CsCl, 8 NaCl,  
118 10 HEPES, 10 EGTA, 2 MgATP (pH 7.3). When filled with intracellular solution,  
119 recording pipettes typically had resistances of 5–7 MΩ.

## 120 **Data analysis**

121 Data were analyzed with WinWCP (Strathclyde Electrophysiology Software,  
122 University of Strathclyde, Glasgow, UK), Clampfit (Axon Instruments), Origin 8.0  
123 (OriginLab, Northampton, MA). Cross-correlation analysis was used to determine the  
124 level of synchronization between CA3 and CA1 field potential recordings. The sampling  
125 data of recordings were filtered by the low pass digital Gaussian filter with a cut-off  
126 frequency of 50 Hz. Cross-correlation function (CCF) was then calculated for paired  
127 signal samples and smoothed using Lowess smoother (span = 0.01). Next, the first CCF  
128 maximum was measured to estimate the level of CA3-CA1 field potential  
129 synchronization. Results are reported as mean cross-correlation value  $\pm$  standard deviation.  
130 Summary data are presented as mean  $\pm$  SD. Two-sample t-test, paired t-test, paired sample  
131 Wilcoxon signed-rank test were used for statistical analysis and  $p < 0.05$  was considered  
132 statistically significant.

133

## 134 **Results**

### 135 **CA3-CA1 synchronous field discharges induced in aCSF with** 136 **AMPA, NMDA and GABA antagonists**

137 Perfusion of hippocampal slices with aCSF containing AMPA, NMDA and GABA  
138 antagonists (DNQX 10 $\mu$ M, MK-801 2 $\mu$ M, bicuculline 10 $\mu$ M) resulted in the development  
139 of robust epileptiform activity in CA3 and CA1 hippocampal areas (Fig 1A). This  
140 epileptiform activity represented rhythmic field discharges that fired continuously or were

141 arranged in bursts. (Fig 1B). Field discharges had a mean duration of  $1.07 \pm 0.34$  sec and  
142 mean frequency of  $0.04 \pm 0.02$  Hz ( $n = 20$ , Fig 1C). Bursts of field discharges had a mean  
143 duration of  $36.37 \pm 11.84$  sec and appeared with a mean inter-burst interval of  $267.09 \pm$   
144  $146.80$  sec; inside of a burst, mean frequency of field discharges was  $0.48 \pm 0.26$  Hz ( $n =$   
145  $12$ , Fig 1B). Field discharges and bursts were synchronized between CA3 and CA1 (cross  
146 correlation  $0.47 \pm 0.17$ ,  $n = 25$ ). Hippocampal slices are known to produce epileptiform  
147 bursting under nonsynaptic conditions such as low- $\text{Ca}^{2+}$  milieu [18-19]. However, here we  
148 hypothesize that different, synaptic mechanisms account for field discharges  
149 synchronization induced in aCSF with AMPA, NMDA, GABA antagonists, unlike  
150 nonsynaptic mechanisms of low- $\text{Ca}^{2+}$  SLA (Fig 1D). The level of synchronization  
151 between CA3 and CA1 in low- $\text{Ca}^{2+}$  aCSF (cross-correlation  $0.05 \pm 0.04$ ,  $n = 12$ ) was  
152 significantly lower ( $p < 0.001$ ) than synchronization of field discharges induced in aCSF  
153 with synaptic blockers (Fig 1).

154

155 **Fig. 1. Hippocampal field discharges in CA3 and CA1 under nonsynaptic conditions.** (A)  
156 Simultaneous recording of synchronous field discharges induced in synaptic blockers aCSF; fragments  
157 of the recording marked with asterisk are shown on B and C. (B) Burst of field discharges. (C) Single  
158 field discharges. (D) Nonsynaptic population spikes induced in low- $\text{Ca}^{2+}$  aCSF; portion of the recording  
159 marked with asterisk is shown on the left.

160 Application of  $\text{CdCl}_2$  abolished synchronous field discharges induced in aCSF with  
161 synaptic blockers (Fig 2A). Following 10 min of stable CA3-CA1 synchronous field



162 bursting (cross-correlation  $0.44 \pm 0.14$ ), 15  $\mu\text{M}$   $\text{CdCl}_2$  was added to the perfusion aCSF,  
163 which resulted in complete blockade of synchronous field discharges (cross-correlation  
164  $0.06 \pm 0.02$ ,  $n = 22$   $p < 0.001$ ). Mean delay time for field discharges abolishment was  $2.68$   
165  $\pm 2.45$  min ( $n = 22$ ); prolonged perfusion with  $\text{CdCl}_2$  resulted in the development of  
166 nonsynaptic population spikes ( $n = 10$ , Fig 2A), which were similar to population spikes  
167 induced in low- $\text{Ca}^{2+}$  aCSF. Simultaneous patch-clamp and field potential recording during  
168 perfusion with aCSF containing AMPA, NMDA and GABA antagonists revealed the  
169 coincidence of synaptic currents with synchronous field discharges but not with the  
170 nonsynaptic population spikes (Fig 2B). Mechanical separation of CA3 and CA1  
171 hippocampal fields resulted in complete abolishment of field discharges in CA1 but not  
172 in CA3 (cross-correlation  $0.51 \pm 0.21$ , after the surgical cut  $-0.13 \pm 0.07$ ,  $n = 10$ ,  $p =$   
173  $0.002$ , Fig 2C).

174

175 **Fig. 2. CA3-CA1 synchronization of field discharges induced in aCSF with AMPA, NMDA, GABA**  
176 **antagonists depends on synaptic connections.** (A) Blockade of the synchronous field discharges  
177 following  $\text{CdCl}_2$  application and the development of nonsynaptic population spikes in CA1. (B)  
178 Simultaneous extracellular (upper trace) and intracellular (bottom trace) recording in CA1 during  
179 perfusion with synaptic blockers aCSF reveals synaptic currents appear during field discharges (1) but  
180 not during nonsynaptic population spikes (2). (C) Field discharges disappear in CA1 but not in CA3 after  
181 a surgical cut was made between CA3 and CA1 recording sites.

182 **Nicotinic acetylcholine receptors account for CA3-CA1 synchronous**  
183 **field discharges induced in aCSF with AMPA, NMDA, GABA antagonists**

184 Synchronous field discharges were blocked following application of nicotinic  
185 antagonist d-tubocurarine. Application of muscarinic antagonist atropine did not abolish  
186 synchronous field discharges. Application  $\alpha 7$  and  $\alpha 4\beta 2$  nAChRs antagonists, MLA and  
187 Dh $\beta$ E respectively, had no significant effect on CA3-CA1 synchronization (Fig 3C, 3D).  
188 Application of nonselective nicotinic antagonist MEC resulted in complete abolishment  
189 of field discharges and significant reduction of CA3-CA1 synchronization. Results are  
190 presented in Table 1.

191 **Table 1. Effect of cholinergic antagonists on CA3-CA1 synchronization of field discharges.**

| Cholinergic antagonist | cross-correlation control | cross-correlation application | statistical significance |         | number of slices |
|------------------------|---------------------------|-------------------------------|--------------------------|---------|------------------|
| atropine               | 0,56 $\pm$ 0,15           | 0,38 $\pm$ 0,19               | -                        | p=0,059 | n=6              |
| d-tubocurarine         | 0,55 $\pm$ 0,25           | 0,13 $\pm$ 0,05               | *                        | p=0,036 | n=6              |
| MLA                    | 0,56 $\pm$ 0,08           | 0,31 $\pm$ 0,18               | -                        | p=0,059 | n=5              |
| Dh $\beta$ E           | 0,48 $\pm$ 0,22           | 0,43 $\pm$ 0,33               | -                        | p=0,85  | n=4              |
| MEC                    | 0,45 $\pm$ 0,18           | 0,10 $\pm$ 0,09               | **                       | p=0,002 | n=12             |

192  
193 **Fig. 3. Effect of cholinergic antagonists on CA3-CA1 synchronous field discharges induced in aCSF**  
194 **with AMPA, NMDA and GABA blockers. (A) Application of d-tubocurarine causes reduction of CA3-**  
195 **CA1 synchronous field discharges. (B) Application of muscarinic antagonist atropine does not block**

196 CA3-CA1 synchronous field discharges. (C) Antagonist of  $\alpha 7$  nAChRs - MLA has no effect on  
197 synchronous field discharges. (D) Antagonist of  $\alpha 4\beta 2$  nAChRs - Dh $\beta$ E has no effect on synchronous  
198 field discharges. (E) Nonselective nicotinic antagonist mecamylamine (MEC) completely abolishes  
199 CA3-CA1 synchronous field discharges. (F) Summary data of the effect of cholinergic antagonists on  
200 cross-correlation between CA3 and CA1 in synaptic blockers aCSF.

201

202 **Effect of MEC on hippocampal SLA induced by bicuculline and 4-**

203 **AP**

204 Next, we tested MEC on its potential antiseizure properties in two models of SLA:  
205 bicuculline and 4-AP. Application of MEC (50  $\mu$ M) significantly reduced amplitude of  
206 bicuculline-induced SLA (in CA3:  $2.04 \pm 1.04$  mV vs  $1.61 \pm 0.95$  mV,  $n = 10$ ,  $p = 0.002$ ;  
207 in CA1:  $3.45 \pm 1.87$  mV vs  $2.19 \pm 1.13$  mV,  $n = 10$ ,  $p = 0.003$ , Fig 4A). There was no  
208 significant effect on the frequency of bicuculline-induced SLA following MEC  
209 application ( $0.13 \pm 0.07$  Hz vs  $0.15 \pm 0.08$  Hz,  $n = 10$ ,  $p=0.27$ ). Application of the selective  
210  $\alpha 7$  nAChRs antagonist – MLA (100nM) and selective antagonist for  $\alpha 4\beta 2$  nAChRs –  
211 Dh $\beta$ E (10 $\mu$ M) had no effect on bicuculline-induced SLA (amplitude in CA3:  $6.88 \pm 3.04$   
212 mV vs  $5.7 \pm 3.1$  mV,  $n = 3$ ,  $p=0.25$  / in CA1:  $5.03 \pm 0.66$  mV vs  $4.38 \pm 0.46$  mV,  $n = 3$ ,  $p$   
213  $= 0.25$ ; frequency:  $0.06 \pm 0.01$  Hz vs  $0.06 \pm 0.03$  Hz,  $n = 3$ ,  $p = 1$ , Fig 4B). Additionally,  
214 application of MEC had no significant effect neither on amplitude (in CA3:  $3.49 \pm 2.09$   
215 mV vs  $2.93 \pm 1.58$  mV,  $n = 5$ ,  $p = 0.81$  / in CA1:  $1.47 \pm 0.45$  mV vs  $1.34 \pm 0.61$  mV,  $n =$

216 5,  $p = 0.78$ ), nor on frequency ( $0.36 \pm 0.06$  Hz vs  $0.33 \pm 0.07$ ,  $n = 5$ ,  $p = 0.62$ ) of SLA  
217 induced by 4-AP (Fig 4C).

218

219 **Fig. 4. Effect of the cholinergic antagonists on hippocampal SLA activity.** (A) Reduction of the  
220 bicuculline-evoked SLA following MEC application. (B) Application of  $\alpha 7$  nAChRs antagonist MLA  
221 and  $\alpha 4\beta 2$  antagonist Dh $\beta$ E has no effect on bicuculline-evoked SLA. (C) Application of MEC has no  
222 effect on 4-AP induced SLA.

223

## 224 Discussion

225 While most of hippocampal synaptic interactions are mediated by glutamate and  
226 GABA receptors, neuromodulation through other synaptic systems, such as ACh, exerts  
227 powerful effects on network function [21]. Considering the extreme hippocampal  
228 propensity for synchronization, we hypothesized that role of endogenous ACh in the  
229 hippocampal field potential synchronization might be detected under conditions of  
230 increased neuronal excitability and in the absence of AMPA, NMDA and GABA  
231 transmission. Since net electrical activity is mostly inhibited under these conditions, we  
232 increased neuronal excitability by decreasing osmolarity, omitting  $Mg^{2+}$  and increasing  
233  $K^+$  concentration in perfusion aCSF as described in earlier studies [17-18]. Under these  
234 conditions of increased neuronal excitability, we observed synchronous field discharges  
235 between CA3 and CA1.

236 Hippocampal networks can sustain robust SLA under nonsynaptic conditions, such  
237 as in the zero-Ca<sup>2+</sup> milieu [20, 22]. Further, perfusion of hippocampal slices with  
238 glutamate and GABA antagonists was shown to induce nonsynaptic bursting similar to  
239 low-Ca<sup>2+</sup> discharges [19]. However, synchronization of discharges between hippocampal  
240 areas has never been observed under nonsynaptic conditions. In the present study, we  
241 report CA3-CA1 synchronous field discharges in the presence of AMPA, NMDA and  
242 GABA antagonists. Addition of CdCl<sub>2</sub> completely abolished synchronous field  
243 discharges, indicating their dependence on voltage-gated calcium channel activation.  
244 After mechanical separation of CA1 from CA3, discharges remained unaffected in CA3  
245 but disappeared in CA1, suggesting CA3 as generating site. Simultaneous patch-clamp  
246 and field potential recordings of postsynaptic activity revealed coincidence between  
247 postsynaptic currents and field discharges. Taken together these results suggest that  
248 observed field discharges have synaptic origin.

249 ACh exerts multiple effects on hippocampal functioning through a wide range of  
250 nicotinic and muscarinic receptors [23-25]. In the present study, atropine had no  
251 significant effect on synchronization of field discharges. However, perfusion with  
252 nicotinic antagonists d-tubocurarine or MEC completely abolished CA3-CA1  
253 synchronous field discharges. These results suggest that activation of nAChRs is able to  
254 sustain hippocampal CA3-CA1 synchronization independently of AMPA, NMDA and  
255 GABA conductivities.

256 Three main types of nAChRs are described on hippocampal neurons, namely  $\alpha 7$ ,  
257  $\alpha 4\beta 2$ , and  $\alpha 3\beta 4$  [26-27]. In our experiments, antagonists of  $\alpha 7$  and  $\alpha 4\beta 2$  nAChRs – MLA  
258 and Dh $\beta$ E respectively had no effect on CA3-CA1 field discharges synchronization.  
259 Meanwhile, MEC, a nonselective and noncompetitive nAChRs antagonist, readily  
260 abolished CA3-CA1 synchronous field discharges and blocked postsynaptic currents  
261 recorded during these events. MEC was initially developed as an antihypertensive  
262 medication, but has been studied recently for its therapeutic potential in several  
263 neuropathological conditions [28-29]. Beneficial effects of MEC has been reported for  
264 epilepsy, substance abuse, depression and anxiety [30-33] and recently it was shown, that  
265 MEC reduces levels of ACh and decreases seizures in pilocarpine-induced status  
266 epilepticus in rats [11]. Here, we report that MEC has a substantial effect on hippocampal  
267 network synchronization, and that this effect is mediated not through  $\alpha 7$  or  $\alpha 4$  nAChRs  
268 subtypes, implying a possible role for  $\alpha 3\beta 4$  subtype. We further studied the effects of  
269 MEC on SLA induced by bicuculline and 4-AP. Application of MEC did not change SLA  
270 in the 4-AP model, suggesting that nAChRs are not involved in this model of epilepsy.  
271 However, MEC caused a significant decrease in the amplitude of bicuculline-induced  
272 SLA. Application of  $\alpha 7$  and  $\alpha 4\beta 2$  antagonists MLA and Dh $\beta$ E had no effect on  
273 bicuculline-induced SLA, further suggesting that this effect of MEC on bicuculline-  
274 induced bursting is mediated not through  $\alpha 7$  or  $\alpha 4\beta 2$  nAChRs subtypes. Thus, our results  
275 support the ability of MEC to decrease hippocampal network synchronization, which  
276 could partially explain therapeutic effects of MEC in a wide variety of CNS disorders.

## 277        **References**

- 278        1. Picciotto MR, Higley MJ and Mineu Y.S. Acetylcholine as a neuromodulator:  
279            cholinergic signaling shapes nervous system function and behavior. *Neuron*.  
280            2012;76(1): 116-129.
- 281        2. Gotti C, Zoli M, and Clementi F. Brain nicotinic acetylcholine receptors: native  
282            subtypes and their relevance. *Trends Pharmacol Sci*. 2006;27(9): 482-491.
- 283        3. Volpicelli LA and Levey AI. Muscarinic acetylcholine receptor subtypes in cerebral  
284            cortex and hippocampus. *Prog Brain Res*. 2004;145: 59-66.
- 285        4. Alkondon M and Albuquerque EX. The nicotinic acetylcholine receptor subtypes  
286            and their function in the hippocampus and cerebral cortex. *Prog Brain Res*.  
287            2004;145: 109-120.
- 288        5. Teles-Grilo Ruivo L and Mellor J. Cholinergic modulation of hippocampal network  
289            function. *Front Synaptic Neurosci*. 2013;5: 2.
- 290        6. Haam J and Yakel JL. Cholinergic modulation of the hippocampal region and  
291            memory function. *J Neurochem*. 2017;142: 111-121.
- 292        7. Dannenberg H, Young K, Hasselmo M. Modulation of hippocampal circuits by  
293            muscarinic and nicotinic receptors. *Front Neural Circuits*. 2017;11: 102.
- 294        8. Kowalczyk T, Bocian R, Konopacki J. The generation of theta rhythm in  
295            hippocampal formation maintained in vitro. *Eur J Neurosci*.2013;37(5): 679-699.

- 296 9. Cobb SR, and Davies CH. Cholinergic modulation of hippocampal cells and circuits.  
297 J Physiol. 2005;562(1): 81-88.
- 298 10. Williams JH and Kauer JA. Properties of carbachol-induced oscillatory activity in  
299 rat hippocampus. J Neurophysiol. 1997;78(5): 2631-2640.
- 300 11. Hillert MH, Imran I, Zimmermann M, Lau H, Weinfurter S, and Klein J. Dynamics  
301 of hippocampal acetylcholine release during lithium-pilocarpine-induced status  
302 epilepticus in rats. J Neurochem. 2014;131(1): 42-52.
- 303 12. Curia G, Longo D, Biagini G, Jones RS and Avoli M. The pilocarpine model of  
304 temporal lobe epilepsy. J Neurosci Methods. 2008;172(2): 143-157.
- 305 13. Lietsche J, Imran I and Klein J. Extracellular levels of ATP and acetylcholine during  
306 lithium-pilocarpine induced status epilepticus in rats. Neurosci Lett. 2016; 611: 69-  
307 73.
- 308 14. Roshan-Milani S, Ferrigan L, Khoshnood MJ, Davies CH, Cobb SR. Regulation of  
309 epileptiform activity in hippocampus by nicotinic acetylcholine receptor activation.  
310 Epilepsy Res. 2003;56(1):51-65.
- 311 15. Fellous, J.M. and Sejnowski, T.J., 2000. Cholinergic induction of oscillations in the  
312 hippocampal slice in the slow(0.5–2 Hz), theta(5–12 Hz), and gamma(35–70 Hz)  
313 bands. Hippocampus. 2000;10(2): 187-197.
- 314 16. Steinlein, OK, Mulley JC, Propping P, Wallace RH, Phillips HA, Sutherland GR,  
315 Scheffer IE, and Berkovic SF. A missense mutation in the neuronal nicotinic



- 316 acetylcholine receptor  $\alpha 4$  subunit is associated with autosomal dominant nocturnal  
317 frontal lobe epilepsy. *Nat Genet.* 1995;11(2): 201-203.
- 318 17. Isaev D, Ivanchick G, Khmyz V, Isaeva, E, Savrasova A, Krishtal O, et al. Surface  
319 charge impact in low-magnesium model of seizure in rat hippocampus. *J*  
320 *Neurophysiol.* 2011;107(1): 417-423.
- 321 18. Haas HL and Jefferys JG. Low-calcium field burst discharges of CA1 pyramidal  
322 neurones in rat hippocampal slices. *J Physiol.* 1984;354(1): 185-201.
- 323 19. Bikson M, Baraban SC, and Durand DM. Conditions sufficient for nonsynaptic  
324 epileptogenesis in the CA1 region of hippocampal slices. *J Neurophysiol.*  
325 2002;87(1): 62-71.
- 326 20. Jefferys JG. Nonsynaptic modulation of neuronal activity in the brain: electric  
327 currents and extracellular ions. *Physiol Rev.* 1995;75(4): 689-723.
- 328 21. Lee SH, and Dan Y. Neuromodulation of brain states. *Neuron.* 2012;76(1): 209-  
329 222.
- 330 22. Konnerth AR, Heinemann U, Yaari YO. Nonsynaptic epileptogenesis in the  
331 mammalian hippocampus in vitro. I. Development of seizure-like activity in low  
332 extracellular calcium. *J Neurophysiol.* 1986;56(2): 409-23.
- 333 23. Yakel JL., Nicotinic ACh receptors in the hippocampus: role in excitability and  
334 plasticity. *Nicotine Tob Res.* 2012;14(11): 1249-1257.

- 335 24. Albuquerque EX, Pereira EF, Alkondon M, Rogers SW. Mammalian nicotinic  
336 acetylcholine receptors: from structure to function. *Physiol. Rev.* 2009;89(1): 73-  
337 120.
- 338 25. Cobb SR, Bulters DO, Suchak S, Riedel G, Morris RG and Davies CH. Activation  
339 of nicotinic acetylcholine receptors patterns network activity in the rodent  
340 hippocampus. *J. Physiol.* 1999;518(1): 131-140.
- 341 26. Alkondon M and Albuquerque EX. The nicotinic acetylcholine receptor subtypes  
342 and their function in the hippocampus and cerebral cortex. *Prog. Brain Res.*  
343 2004;145: 109-120.
- 344 27. Picciotto MR, Caldarone BJ, King SL and Zachariou V. Nicotinic receptors in the  
345 brain: links between molecular biology and behavior. *Neuropsychopharmacol.*  
346 2000;22(5): 451-465.
- 347 28. Shytle RD, Penny E, Silver AA, Goldman J and Sanberg PR. Mecamylamine  
348 (Inversine®): an old antihypertensive with new research directions. *J. Hum.*  
349 *Hypertens.* 2002;16(7): 453.
- 350 29. Schneckloth RE, Corcoran AC, Dustan HP and Page IH. Mecamylamine in  
351 Treatment of Hypertensive Disease: Observations on an Unusual Neuromuscular  
352 Complication. *J. Am. Med. Assoc.* 1956;162(9): 868-875.

- 353 30. Bacher I, Wu B, Shytle DR and George TP. Mecamylamine—a nicotinic  
354 acetylcholine receptor antagonist with potential for the treatment of  
355 neuropsychiatric disorders. *Expert. Opin. Pharmacother.* 2009;10(16): 2709-2721.
- 356 31. Lancaster, T and Stead LF. Mecamylamine (a nicotine antagonist) for smoking  
357 cessation. *Cochrane Database of Systematic Reviews.* 1998;(2).
- 358 32. Nickell JR, Grinevich VP, Siripurapu KB, Smith AM and Dwoskin LP. Potential  
359 therapeutic uses of mecamylamine and its stereoisomers. *Pharmacol. Biochem.*  
360 *Behav.* 2013;108: 28-43.
- 361 33. Petrakis IL, Ralevski E, Gueorguieva R, O'Malley SS, Arias A, Sevarino KA, Jane  
362 JS, O'Brien E and Krystal JH. Mecamylamine treatment for alcohol dependence: a  
363 randomized controlled trial. *Addiction.* 2018;113(1): 6-14.
- 364

A

# DNQX / Mk-801 / Bicuculline

bioRxiv preprint doi: <https://doi.org/10.1101/2020.09.21.306019>; this version posted September 21, 2020. The copyright holder for this preprint (which was not certified by peer review) is the author/funder, who has granted bioRxiv a license to display the preprint in perpetuity. It is made available under aCC-BY 4.0 International license.

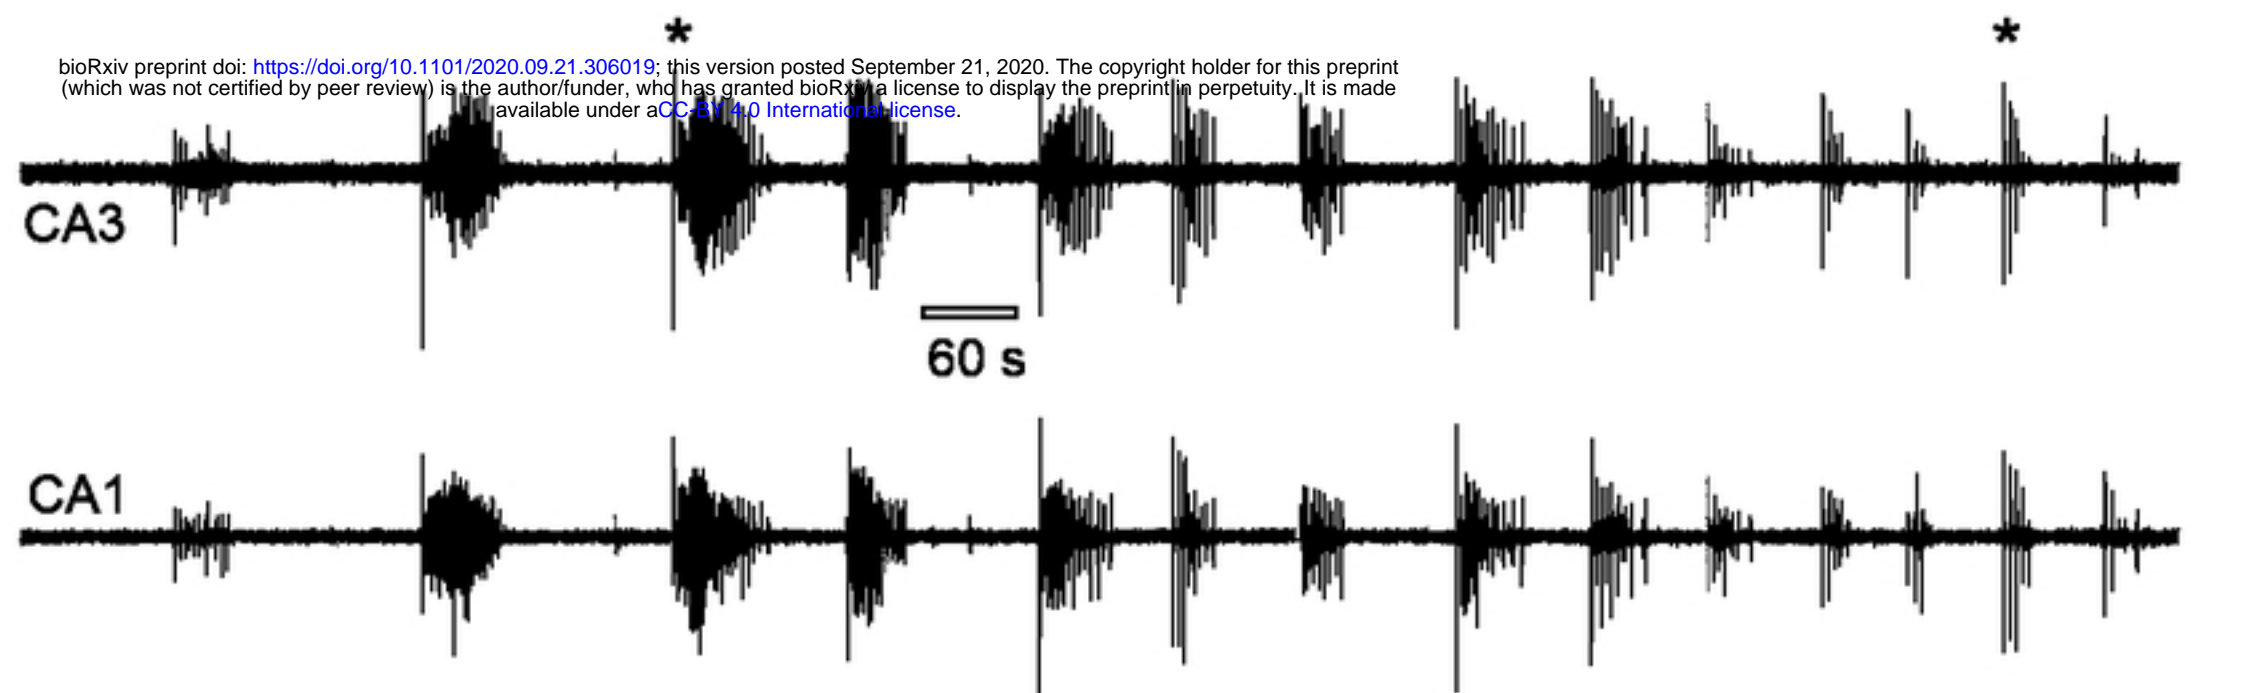

B

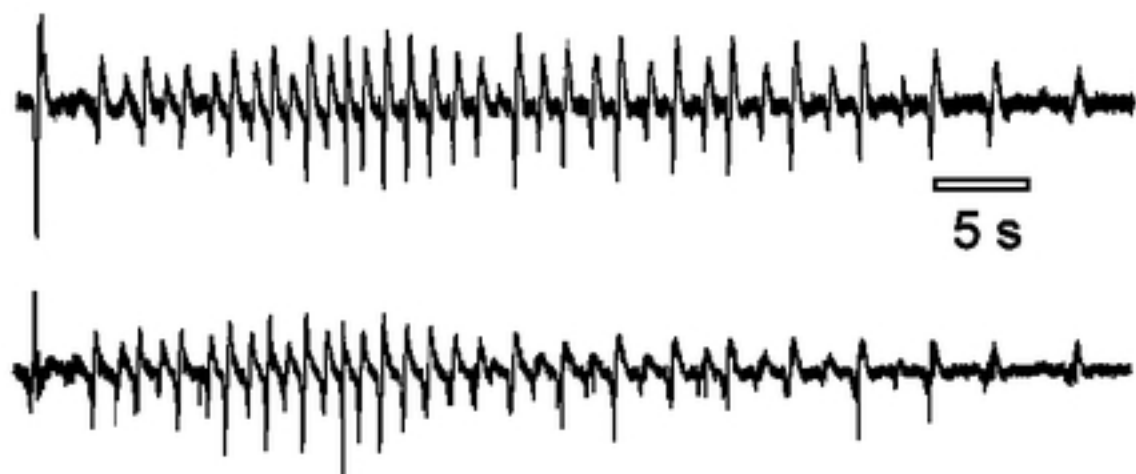

C

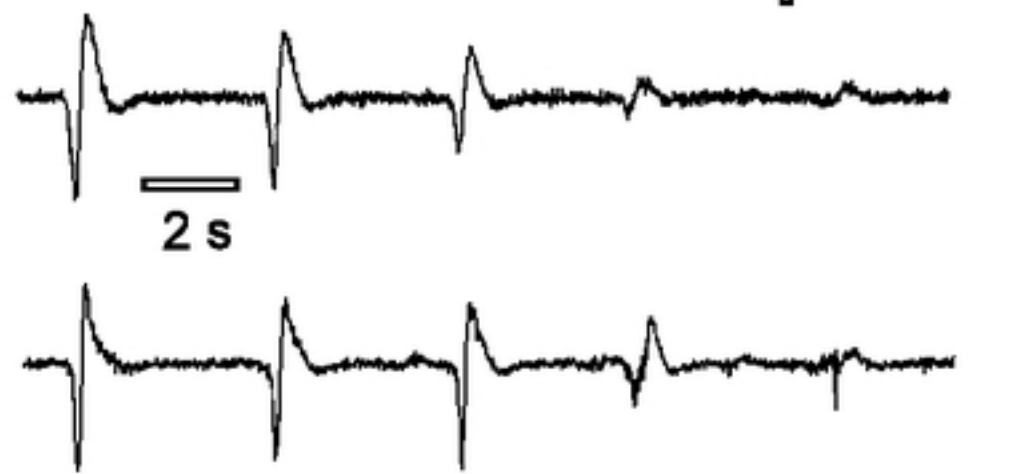

D

Low  $[Ca^{2+}]_o$

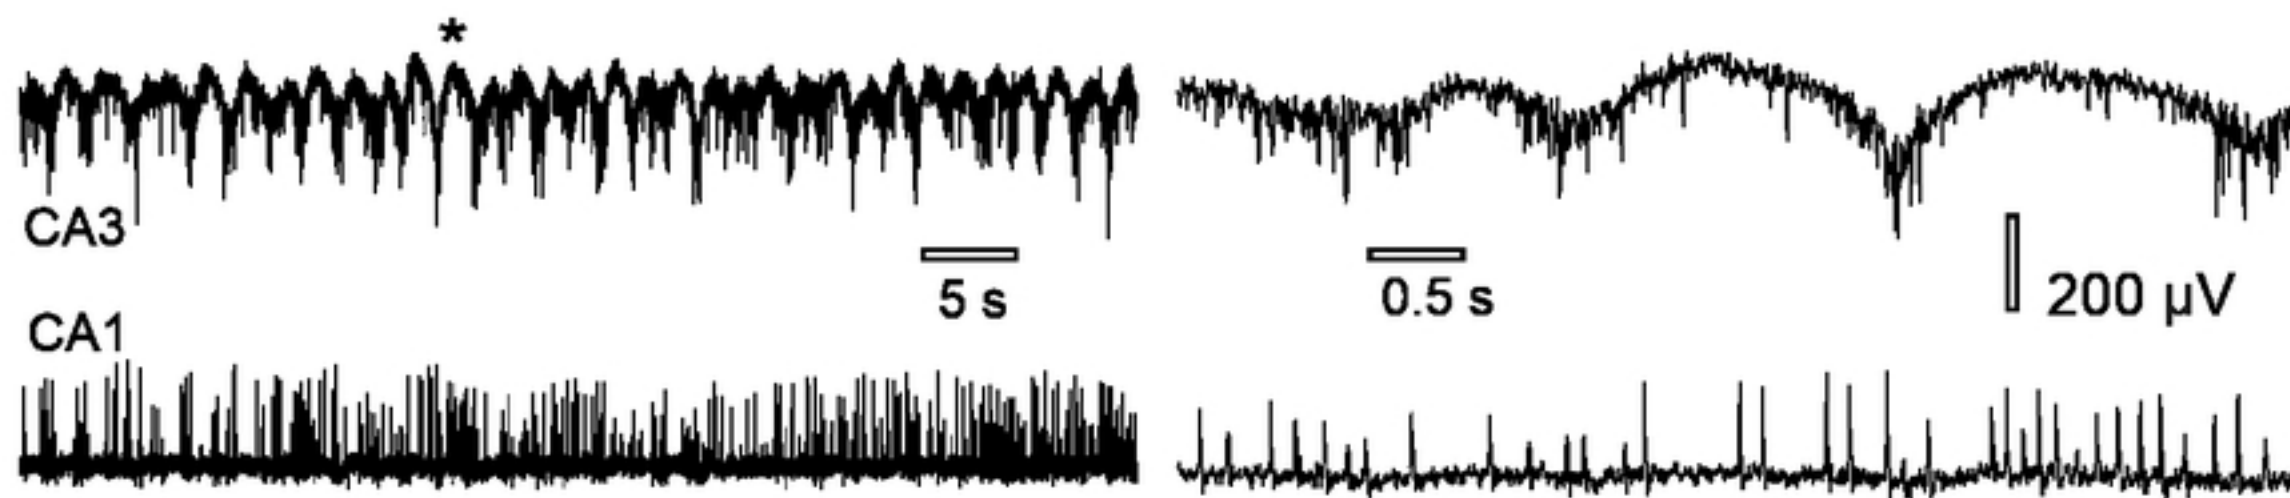

Figure 1

A

CdCl<sub>2</sub>

DNQX / Mk-801 / Bicuculline

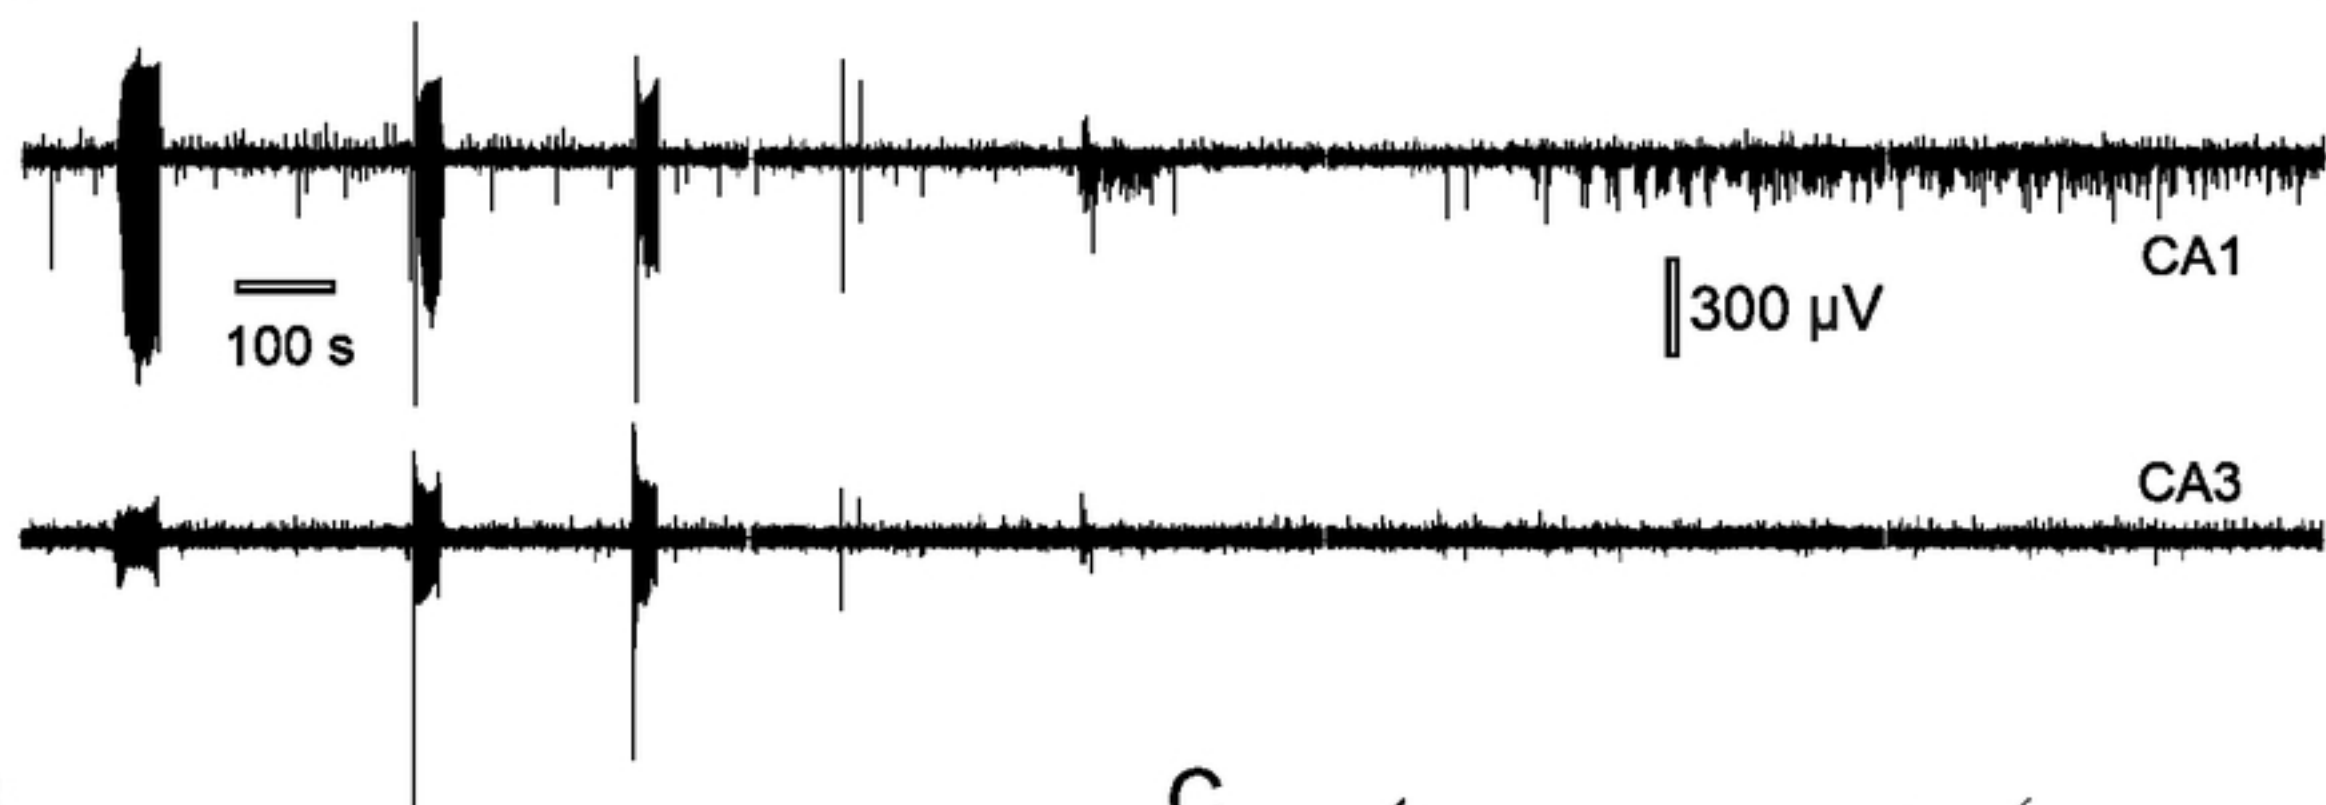

B

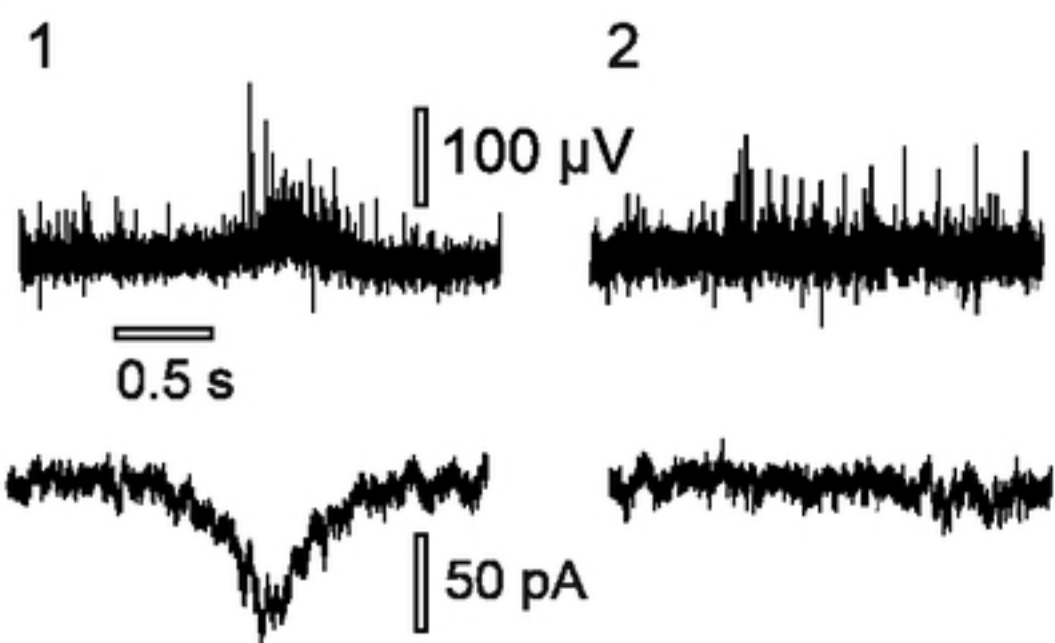

C

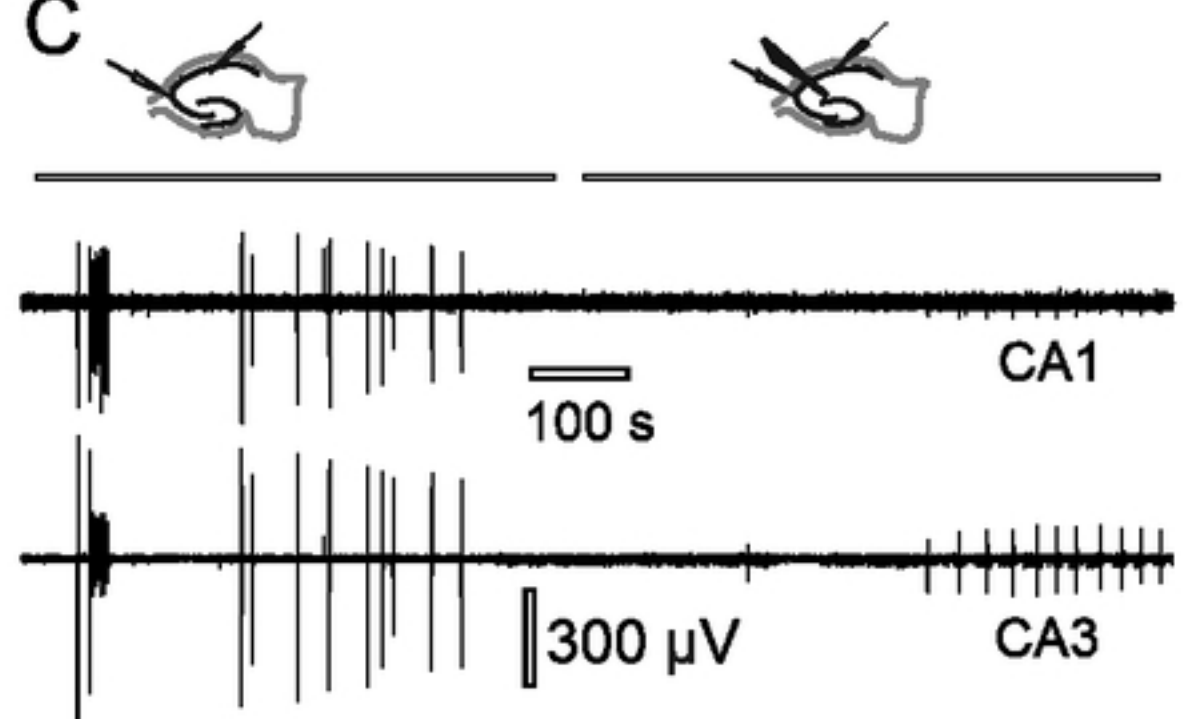

Figure 2

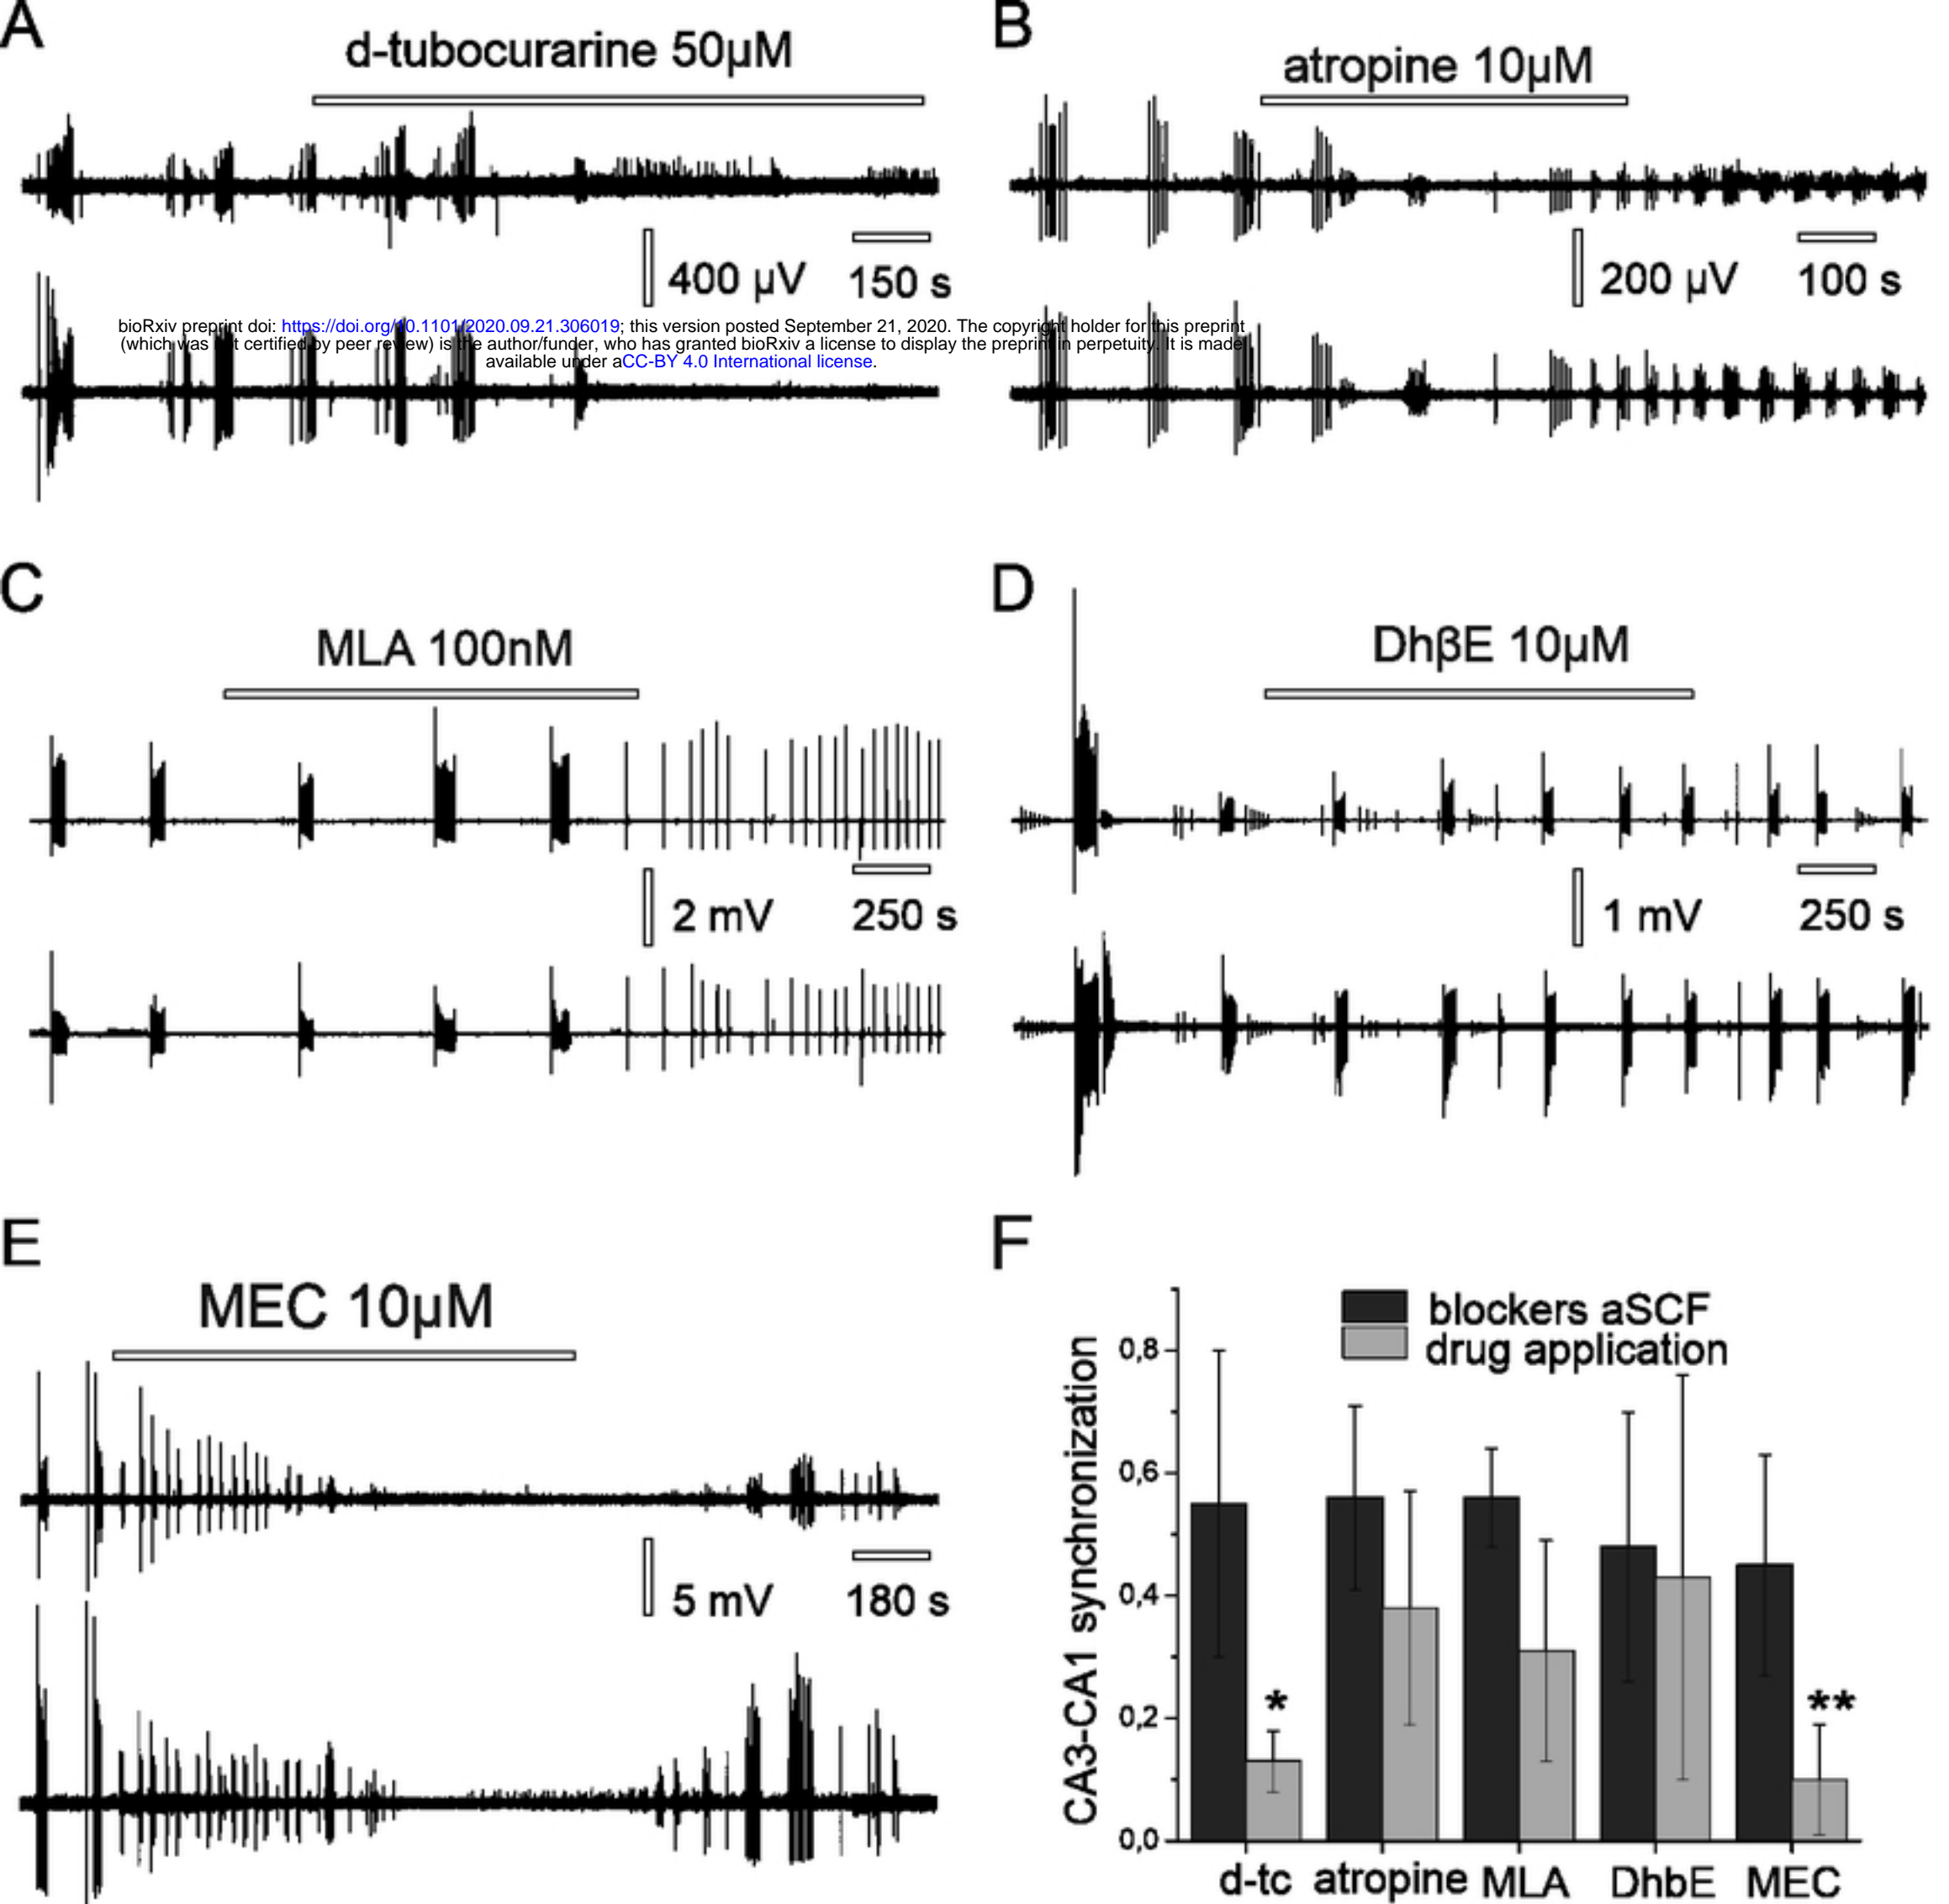

Figure 3



A

MEC 50  $\mu$ MBicuculline 10  $\mu$ M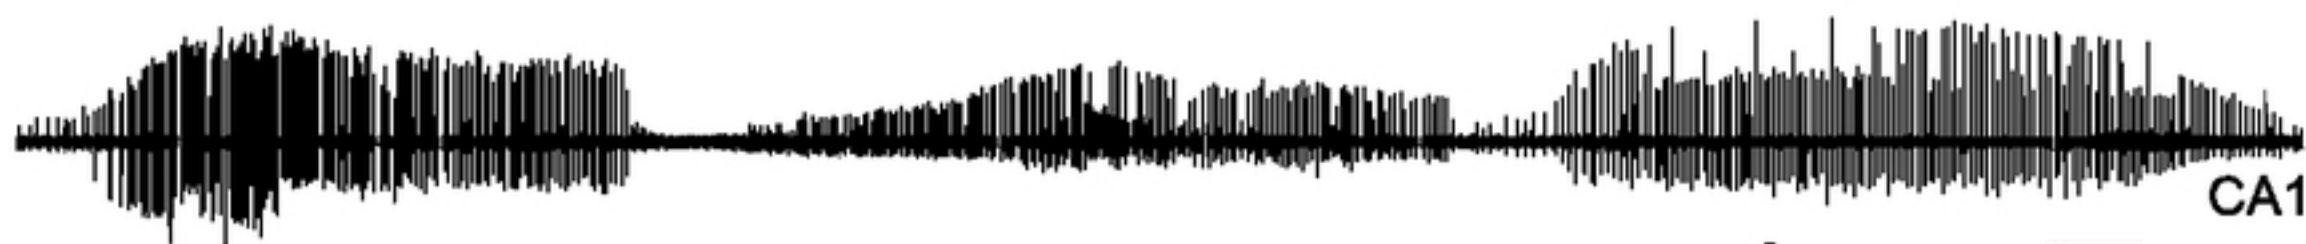

5 mV 120 s

CA1

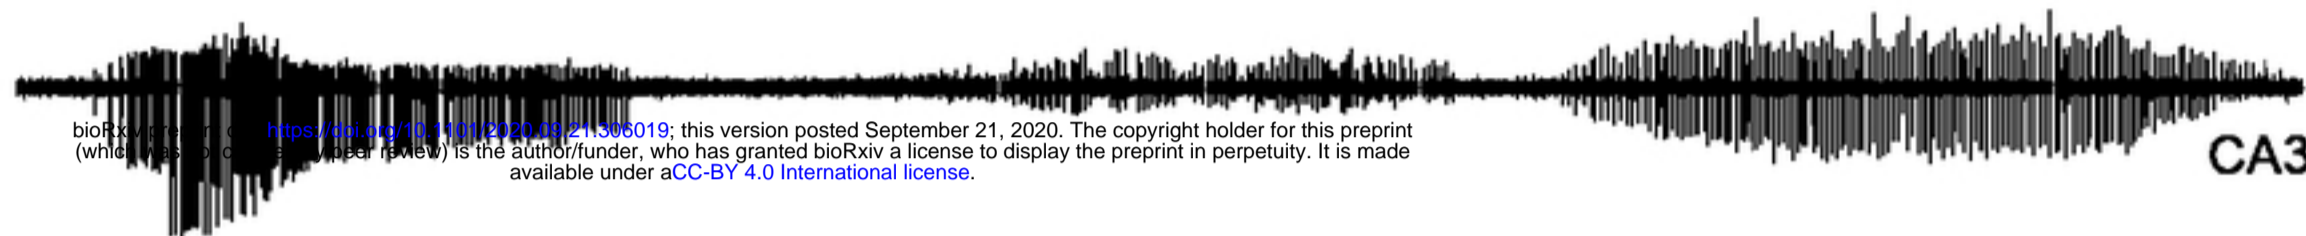

bioRxiv preprint doi: <https://doi.org/10.1101/2020.09.21.306019>; this version posted September 21, 2020. The copyright holder for this preprint (which was not certified by peer review) is the author/funder, who has granted bioRxiv a license to display the preprint in perpetuity. It is made available under aCC-BY 4.0 International license.

CA3

B

DhbE 10  $\mu$ M

MLA 10 nM

Bicuculline 10  $\mu$ M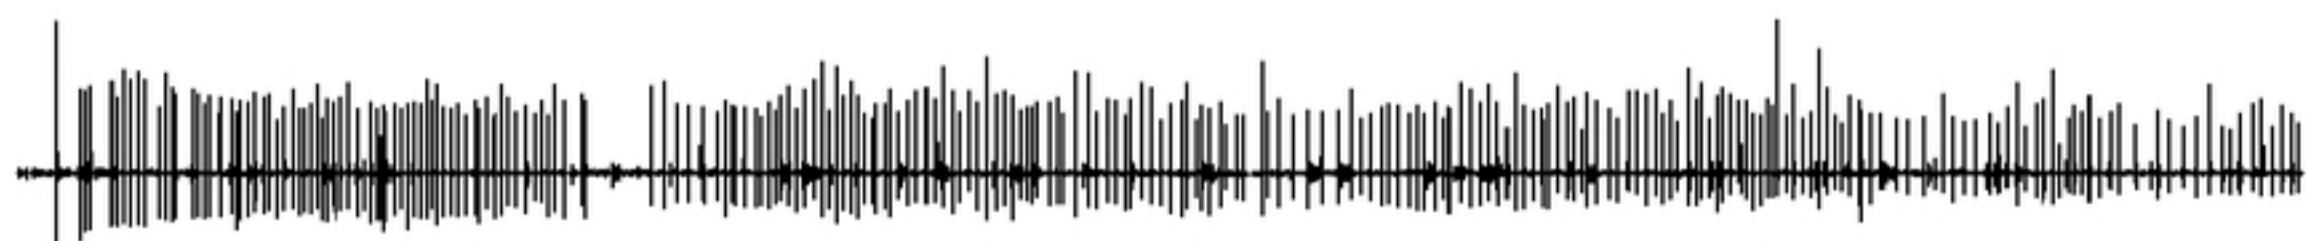

10 mV 120 s

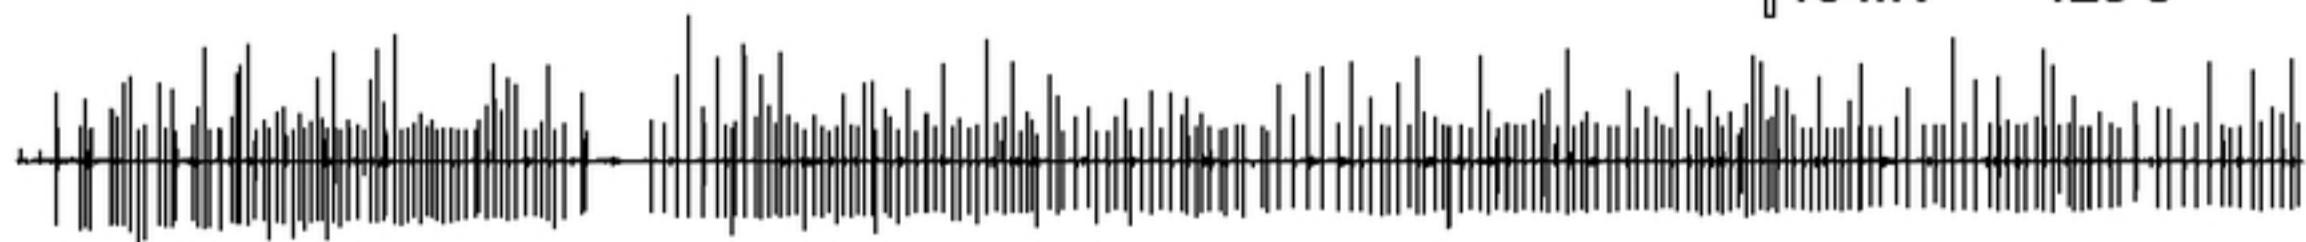

C

MEC 50  $\mu$ M4-AP 100  $\mu$ M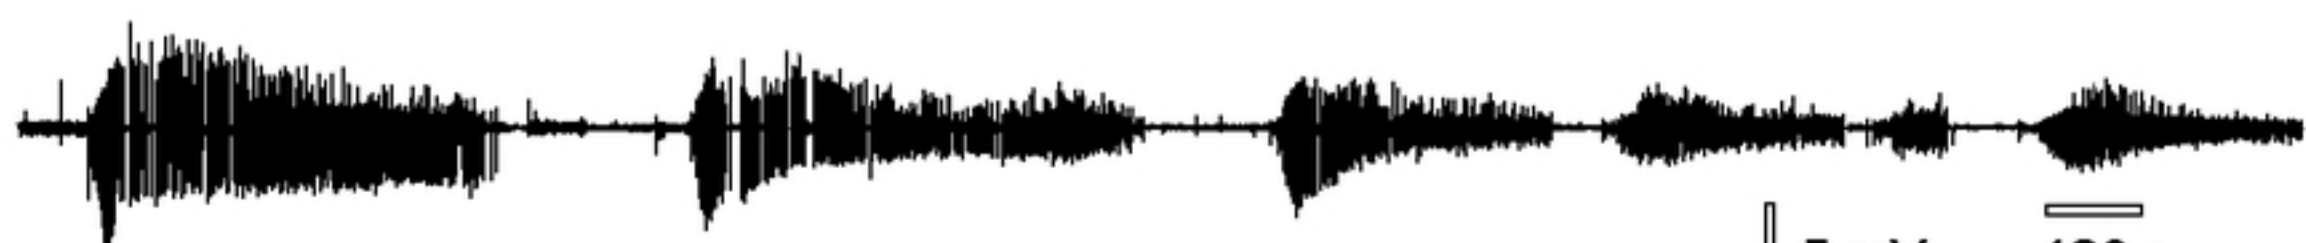

5 mV 120 s

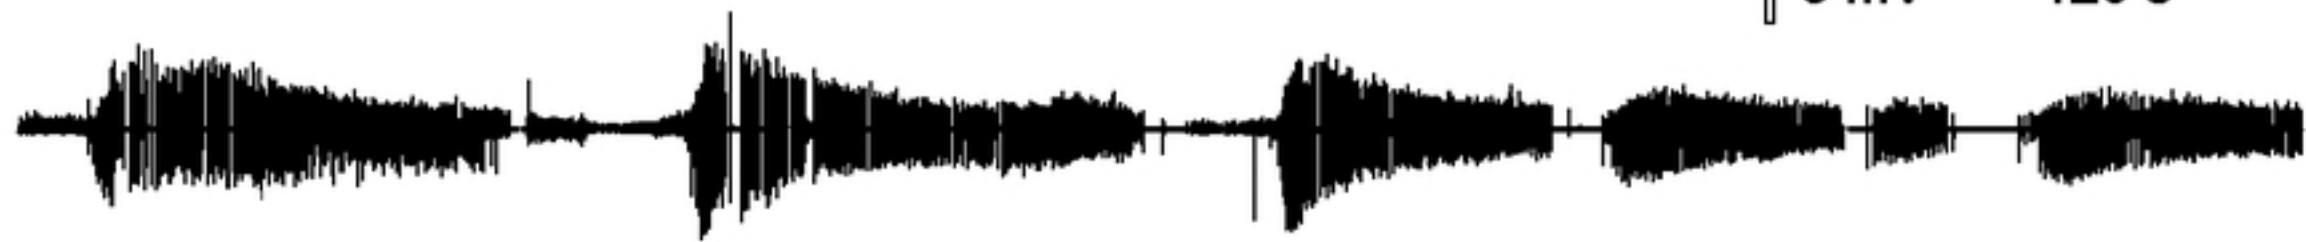

Figure 4
